# Supplementary material for: Turn-on detection of Al3+ and Zn2+ ions by a NSN donor probe: reversibility, logic gates and DFT calculations
Source: Royal Society of Chemistry journal article supplement (doi:10.1039/d3ay01534c), 2023-01-01

## checkCIF/PLATON report

Structure factors have been supplied for datablock(s) datam

THIS REPORT IS FOR GUIDANCE ONLY. IF USED AS PART OF A REVIEW PROCEDURE FOR PUBLICATION, IT SHOULD NOT REPLACE THE EXPERTISE OF AN EXPERIENCED CRYSTALLOGRAPHIC REFEREE.

No syntax errors found.      CIF dictionary      Interpreting this report

### Datablock: datam

---

Bond precision:    C-C = 0.0125 Å                      Wavelength=1.54184

Cell:                      a=5.7751(6)              b=46.275(3)              c=7.7780(8)  
                                    alpha=90              beta=90.655(10)              gamma=90

Temperature:              150 K

|                        | Calculated   | Reported            |
|------------------------|--------------|---------------------|
| Volume                 | 2078.5(3)    | 2078.5(3)           |
| Space group            | P 21/n       | P 21/n              |
| Hall group             | -P 2yn       | -P 2yn              |
| Moiety formula         | C26 H24 N2 S | ?                   |
| Sum formula            | C26 H24 N2 S | C26 H24 Cl0 N2 O0 S |
| Mr                     | 396.53       | 396.53              |
| Dx, g cm <sup>-3</sup> | 1.267        | 1.267               |
| Z                      | 4            | 4                   |
| Mu (mm <sup>-1</sup> ) | 1.476        | 1.476               |
| F000                   | 840.0        | 840.0               |
| F000'                  | 843.34       |                     |
| h, k, lmax             | 7, 56, 9     | 6, 55, 9            |
| Nref                   | 3889         | 2774                |
| Tmin, Tmax             | 0.767, 0.863 |                     |
| Tmin'                  | 0.767        |                     |

Correction method= Not given

Data completeness= 0.713                      Theta(max)= 69.646

R(reflections)= 0.1178( 1696)

wR2(reflections)=  
0.3474( 2774)

S = 1.119

Npar= 263

---

The following ALERTS were generated. Each ALERT has the format  
**test-name\_ALERT\_alert-type\_alert-level.**

Click on the hyperlinks for more details of the test.

---

 **Alert level A**

PLAT029\_ALERT\_3\_A \_diffn\_measured\_fraction\_theta\_full value Low . 0.729 Why?

---

**Author Response: Poorly diffracting crystal. Used only to authenticate atom-connectivit**

---

 **Alert level B**

PLAT031\_ALERT\_4\_B Refined Extinction Parameter Within Range of ... 2.333 Sigma  
PLAT340\_ALERT\_3\_B Low Bond Precision on C-C Bonds ..... 0.01254 Ang.  
PLAT911\_ALERT\_3\_B Missing FCF Refl Between Thmin & STh/L= 0.600 1017 Report

---

 **Alert level C**

PLAT052\_ALERT\_1\_C Info on Absorption Correction Method Not Given Please Do !  
PLAT057\_ALERT\_3\_C Correction for Absorption Required RT(exp) ... 1.13 Do !  
PLAT082\_ALERT\_2\_C High R1 Value ..... 0.12 Report  
PLAT084\_ALERT\_3\_C High wR2 Value (i.e. > 0.25) ..... 0.35 Report  
PLAT213\_ALERT\_2\_C Atom C4 has ADP max/min Ratio .... 3.1 oblate  
PLAT213\_ALERT\_2\_C Atom C9 has ADP max/min Ratio .... 3.5 oblate  
PLAT250\_ALERT\_2\_C Large U3/U1 Ratio for Average U(i,j) Tensor .... 2.1 Note  
PLAT767\_ALERT\_4\_C INS Embedded LIST 6 Instruction Should be LIST 4 Please Check  
PLAT906\_ALERT\_3\_C Large K Value in the Analysis of Variance ..... 27.541 Check  
PLAT906\_ALERT\_3\_C Large K Value in the Analysis of Variance ..... 4.881 Check  
PLAT906\_ALERT\_3\_C Large K Value in the Analysis of Variance ..... 2.023 Check

---

 **Alert level G**

CELLZ01\_ALERT\_1\_G Difference between formula and atom\_site contents detected.

CELLZ01\_ALERT\_1\_G ALERT: Large difference may be due to a

symmetry error - see SYMMG tests

From the CIF: \_cell\_formula\_units\_Z 4

From the CIF: \_chemical\_formula\_sum C26 H24 Cl0 N2 O0 S

TEST: Compare cell contents of formula and atom\_site data

| atom | Z*formula | cif sites | diff |
|------|-----------|-----------|------|
| C    | 104.00    | 104.00    | 0.00 |
| H    | 96.00     | 96.00     | 0.00 |
| Cl   | 4.00      | 0.00      | 4.00 |
| N    | 8.00      | 8.00      | 0.00 |
| O    | 4.00      | 0.00      | 4.00 |
| S    | 4.00      | 4.00      | 0.00 |

PLAT003\_ALERT\_2\_G Number of Uiso or Uij Restrained non-H Atoms ... 29 Report  
PLAT083\_ALERT\_2\_G SHELXL Second Parameter in WGHT Unusually Large 17.77 Why ?  
PLAT178\_ALERT\_4\_G The CIF-Embedded .res File Contains SIMU Records 1 Report  
PLAT187\_ALERT\_4\_G The CIF-Embedded .res File Contains RIGU Records 1 Report  
PLAT802\_ALERT\_4\_G CIF Input Record(s) with more than 80 Characters 1 Info  
PLAT860\_ALERT\_3\_G Number of Least-Squares Restraints ..... 407 Note  
PLAT883\_ALERT\_1\_G No Info/Value for \_atom\_sites\_solution\_primary . Please Do !

|                                                                    |        |      |
|--------------------------------------------------------------------|--------|------|
| PLAT899_ALERT_4_G SHELXL2018 is Deprecated and Succeeded by SHELXL | 2019/3 | Note |
| PLAT912_ALERT_4_G Missing # of FCF Reflections Above STh/L= 0.600  | 94     | Note |
| PLAT941_ALERT_3_G Average HKL Measurement Multiplicity .....       | 1.3    | Low  |
| PLAT978_ALERT_2_G Number C-C Bonds with Positive Residual Density. | 0      | Info |

- 
- 1 **ALERT level A** = Most likely a serious problem - resolve or explain
  - 3 **ALERT level B** = A potentially serious problem, consider carefully
  - 11 **ALERT level C** = Check. Ensure it is not caused by an omission or oversight
  - 13 **ALERT level G** = General information/check it is not something unexpected
- 
- 4 ALERT type 1 CIF construction/syntax error, inconsistent or missing data
  - 7 ALERT type 2 Indicator that the structure model may be wrong or deficient
  - 10 ALERT type 3 Indicator that the structure quality may be low
  - 7 ALERT type 4 Improvement, methodology, query or suggestion
  - 0 ALERT type 5 Informative message, check
- 

It is advisable to attempt to resolve as many as possible of the alerts in all categories. Often the minor alerts point to easily fixed oversights, errors and omissions in your CIF or refinement strategy, so attention to these fine details can be worthwhile. In order to resolve some of the more serious problems it may be necessary to carry out additional measurements or structure refinements. However, the purpose of your study may justify the reported deviations and the more serious of these should normally be commented upon in the discussion or experimental section of a paper or in the "special\_details" fields of the CIF. checkCIF was carefully designed to identify outliers and unusual parameters, but every test has its limitations and alerts that are not important in a particular case may appear. Conversely, the absence of alerts does not guarantee there are no aspects of the results needing attention. It is up to the individual to critically assess their own results and, if necessary, seek expert advice.

### **Publication of your CIF in IUCr journals**

A basic structural check has been run on your CIF. These basic checks will be run on all CIFs submitted for publication in IUCr journals (*Acta Crystallographica*, *Journal of Applied Crystallography*, *Journal of Synchrotron Radiation*); however, if you intend to submit to *Acta Crystallographica Section C* or *E* or *IUCrData*, you should make sure that full publication checks are run on the final version of your CIF prior to submission.

### **Publication of your CIF in other journals**

Please refer to the *Notes for Authors* of the relevant journal for any special instructions relating to CIF submission.

---

**PLATON version of 10/05/2023; check.def file version of 10/05/2023**

Datablock datam - ellipsoid plot

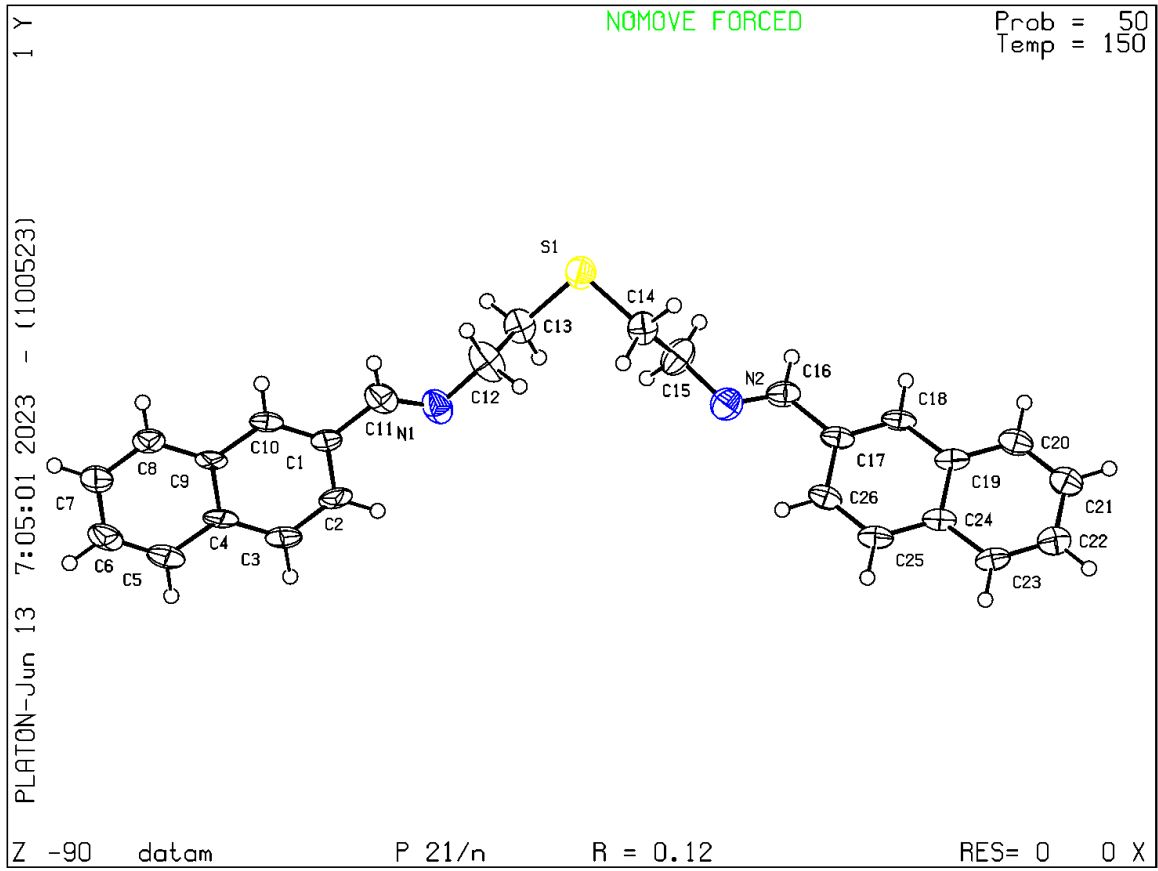

Supplement: d3ay01534c1.pdf [file d3ay01534c1.pdf]
