# Supplementary material for: Turn-on detection of Al3+ and Zn2+ ions by a NSN donor probe: reversibility, logic gates and DFT calculations
Source: Royal Society of Chemistry journal article supplement (doi:10.1039/d3ay01534c), 2023-01-01
Supplement: d3ay01534c3.pdf [file d3ay01534c3.pdf]

## Supporting Material

for

### **Turn-on detection of Al<sup>3+</sup> and Zn<sup>2+</sup> ions by NSN donors probe: Reversibility, logic gates and DFT calculations**

Sudhanshu Naithani<sup>a</sup>, Nidhi Goswami<sup>a</sup>, Sain Singh<sup>b</sup>, Vikas Yadav<sup>c</sup>, Sanjay Kumar<sup>d,e</sup>, Pramod Kumar<sup>f</sup>, Amit Kumar<sup>a\*</sup>, Tapas Goswami<sup>a\*</sup>, Sushil Kumar<sup>a\*</sup>

<sup>a</sup> *Department of Chemistry, Applied Science Cluster, University of Petroleum and Energy Studies (UPES), Dehradun-248007, Uttarakhand, India. Email: [sushil.k@ddn.upes.ac.in](mailto:sushil.k@ddn.upes.ac.in)*

<sup>b</sup> *Department of Chemistry, Indian Institute of Technology Roorkee, 247667, Uttarakhand, India.*

<sup>c</sup> *Nanoscope Imaging and Sensing Lab, Indian Institute of Technology Delhi, Hauz Khas, New Delhi 110016, India.*

<sup>d</sup> *Department of Chemistry, Muzaffarpur Institute of Technology, Muzaffarpur- 842003, India;* <sup>e</sup> *Department of Pharmacy, Muzaffarpur Institute of Technology, Muzaffarpur- 842003, India.*

<sup>f</sup> *Department of Chemistry, Mahamana Malviya College Khekra (Baghpat), C.C.S. University Meerut, India.*

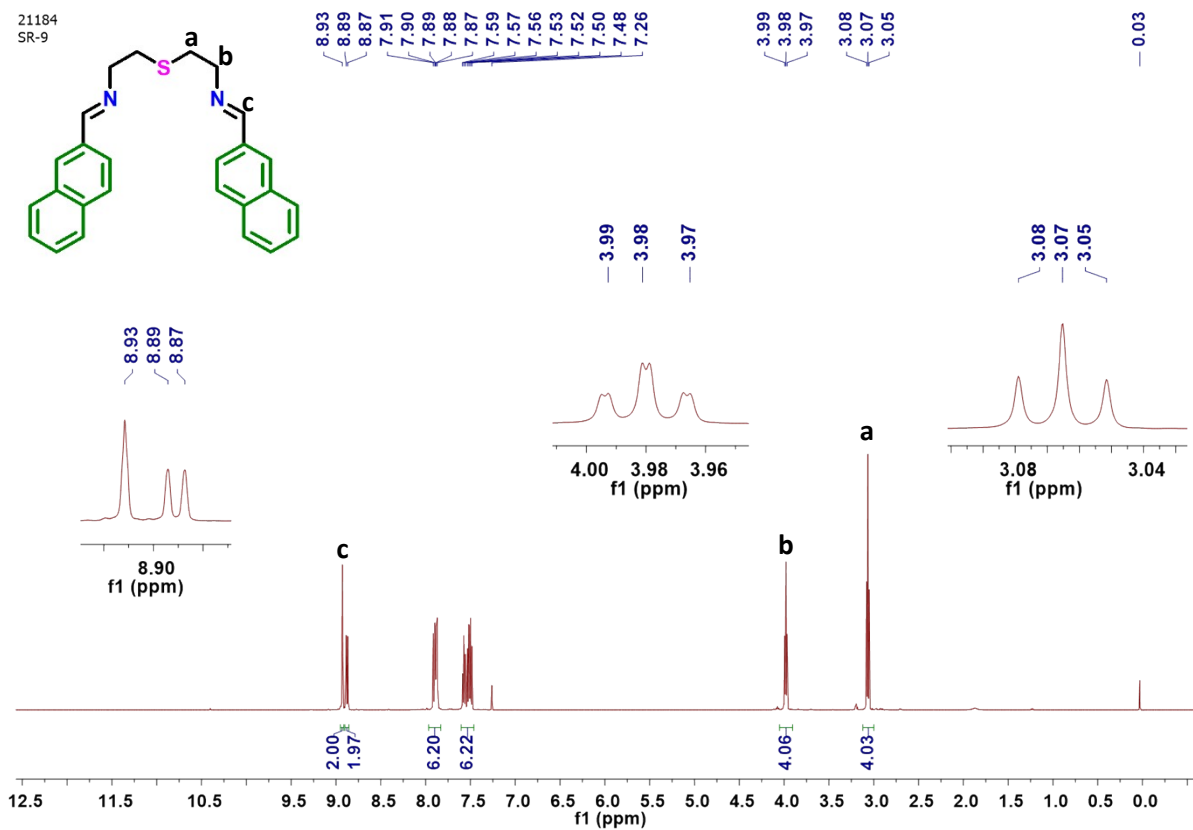

**Fig. S1.**  $^1\text{H}$  NMR spectrum of **NpSb** in  $\text{CDCl}_3$  at room temperature.  $^1\text{H}$  NMR ( $\text{CDCl}_3$ , 500 MHz, TMS),  $\delta$  (ppm): 8.93 (s, 2H,  $-\text{CH}=\text{N}-$ ), 8.89 (m, 2H), 7.89 (m, 6H), 7.59-7.48 (m, 6H), 3.98 (t, 4H,  $-\text{CH}_2-\text{N}-$ ), 3.07 (t, 4H,  $-\text{CH}_2-\text{S}<$ ).

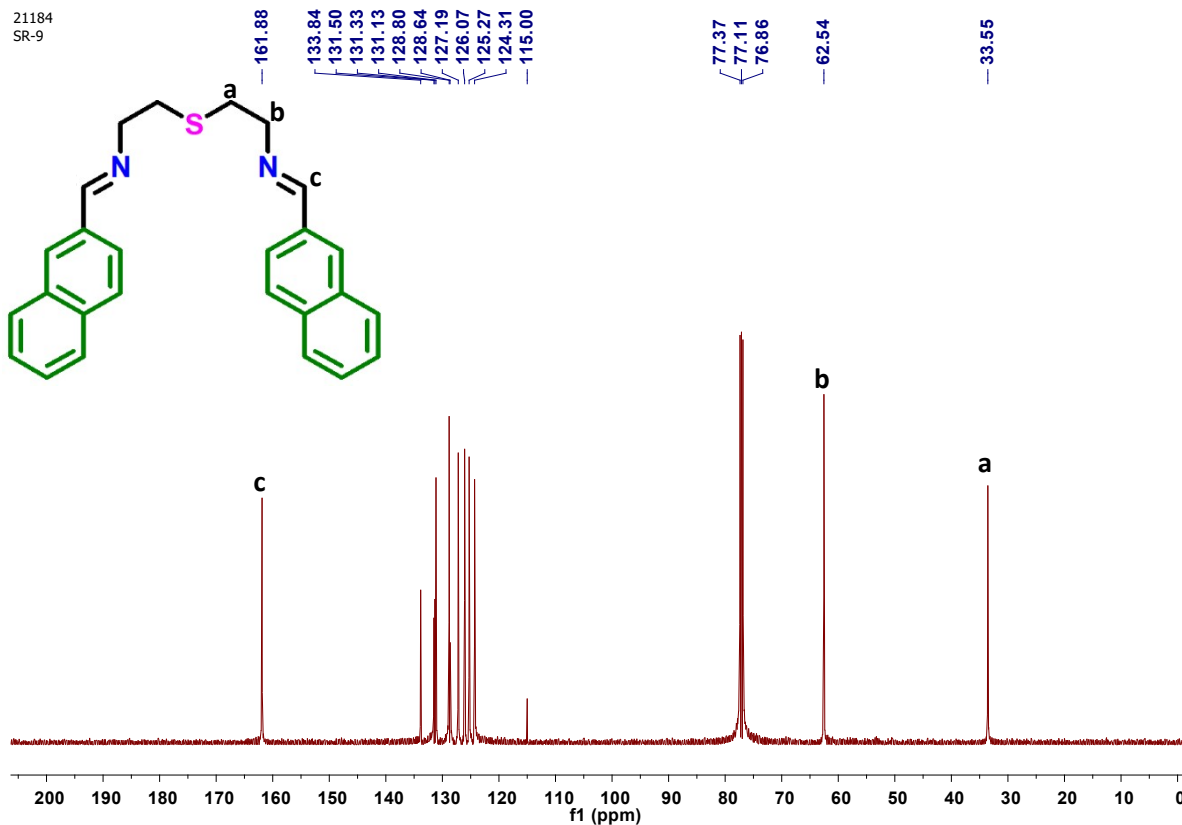

**Fig. S2.**  $^{13}\text{C}$  NMR spectrum of **NpSb** in  $\text{CDCl}_3$  at room temperature.  $^{13}\text{C}$  NMR ( $\text{CDCl}_3$ , 500 MHz),  $\delta$  (ppm): 161.88, 133.84, 131.50, 131.33, 131.13, 128.80, 128.64, 127.19, 126.07, 125.47, 124.31, 115.00, 62.54, 33.55.

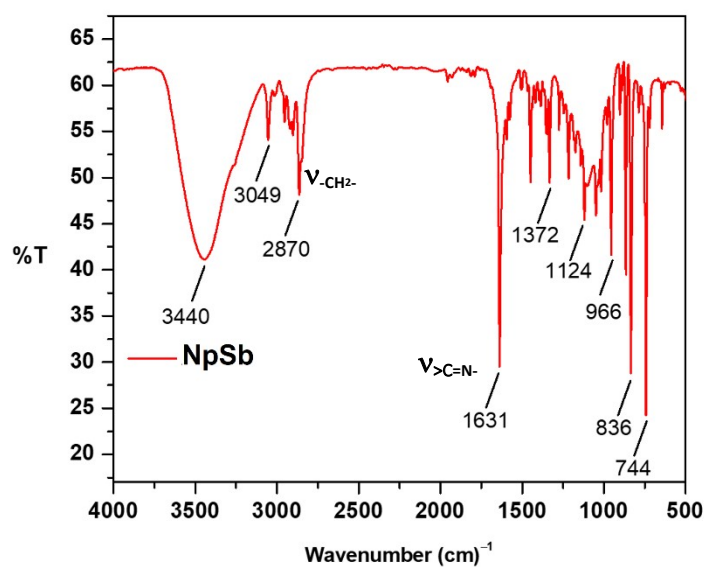

**Fig. S3.** FT-IR spectrum of **NpSb**. IR data (KBr disk,  $\text{cm}^{-1}$ ): 3440, 3049, 2870, 1631 ( $\nu_{\text{C}=\text{N}}$ ), 1372, 1124, 966, 836, 744.

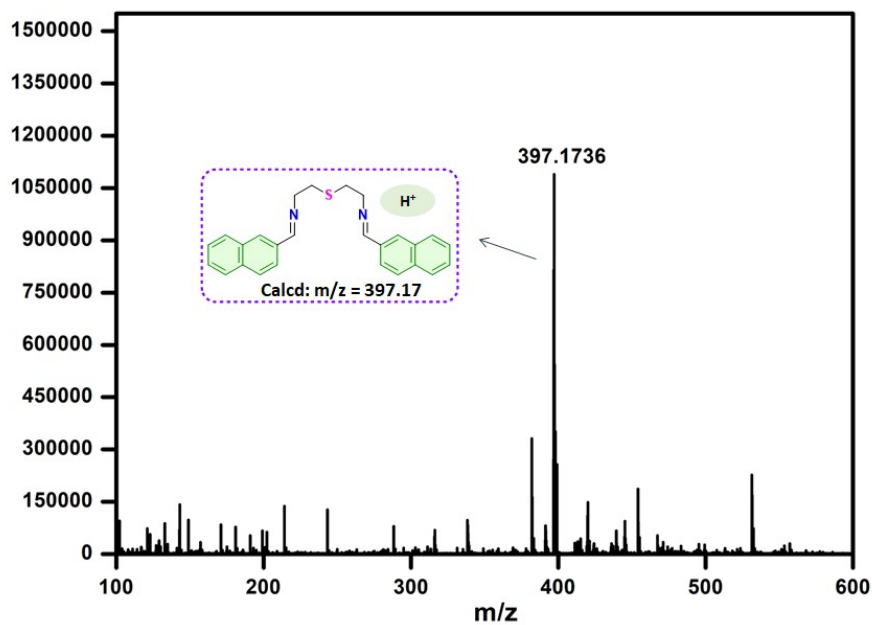

**Fig. S4.** ESI-MS analysis of probe **NpSb** in methanol at room temperature.

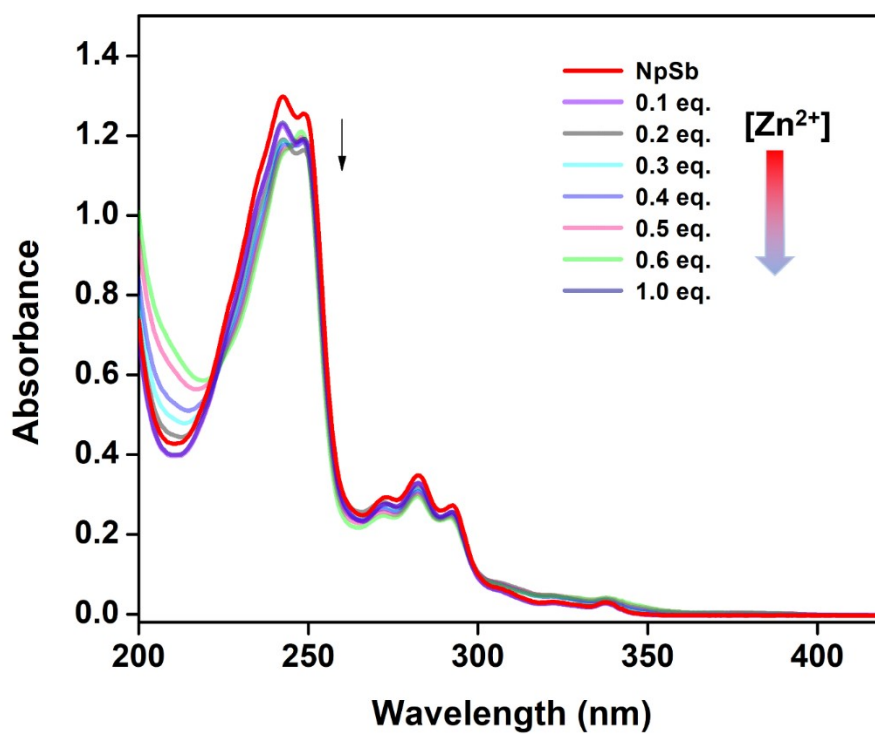

**Fig. S5.** UV-Vis spectral changes for **NpSb** ( $1.0 \times 10^{-5}$  M) in  $\text{CH}_3\text{CN-H}_2\text{O}$  (4:1, v/v) after successive addition of  $\text{Zn}^{2+}$  ions (0-1.0 equiv.).

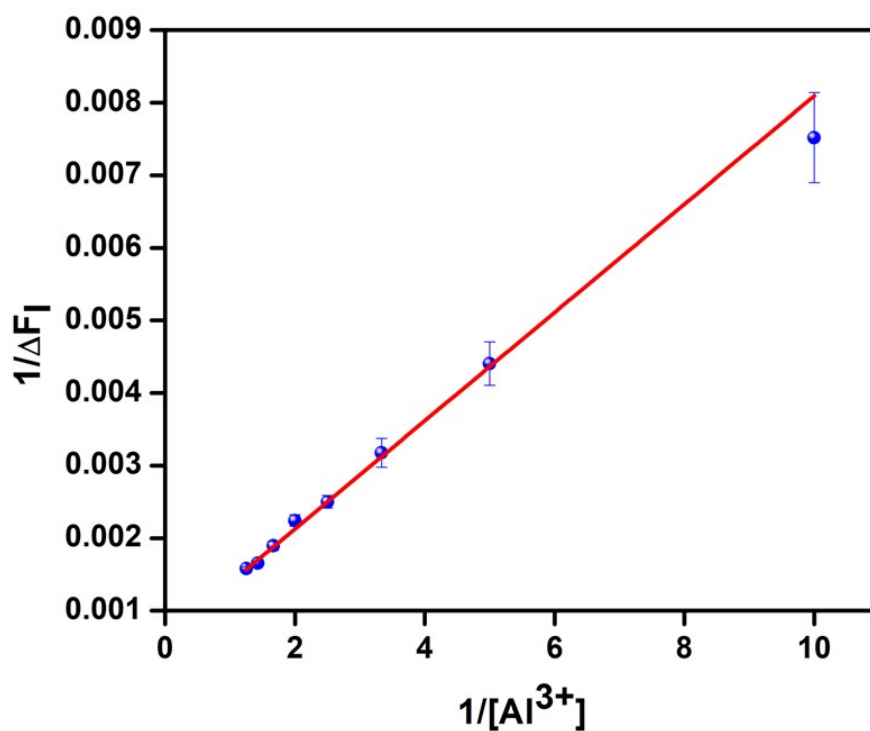

**Fig. S6.** Determination of binding constant of **NpSb** for  $\text{Al}^{3+}$  by employing Benesi-Hildebrand plots from fluorescence spectroscopy.

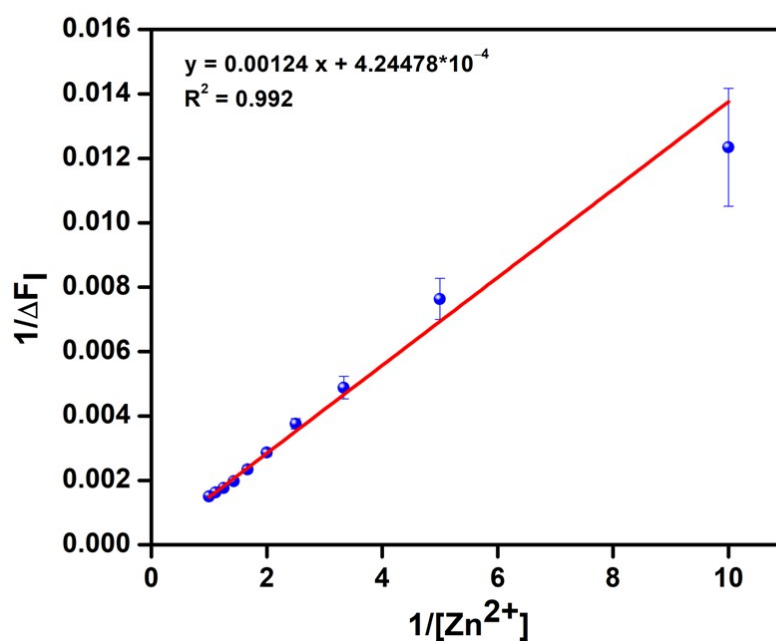

**Fig. S7.** Determination of binding constant of **NpSb** for  $\text{Zn}^{2+}$  by employing Benesi-Hildebrand plots from fluorescence spectroscopy.

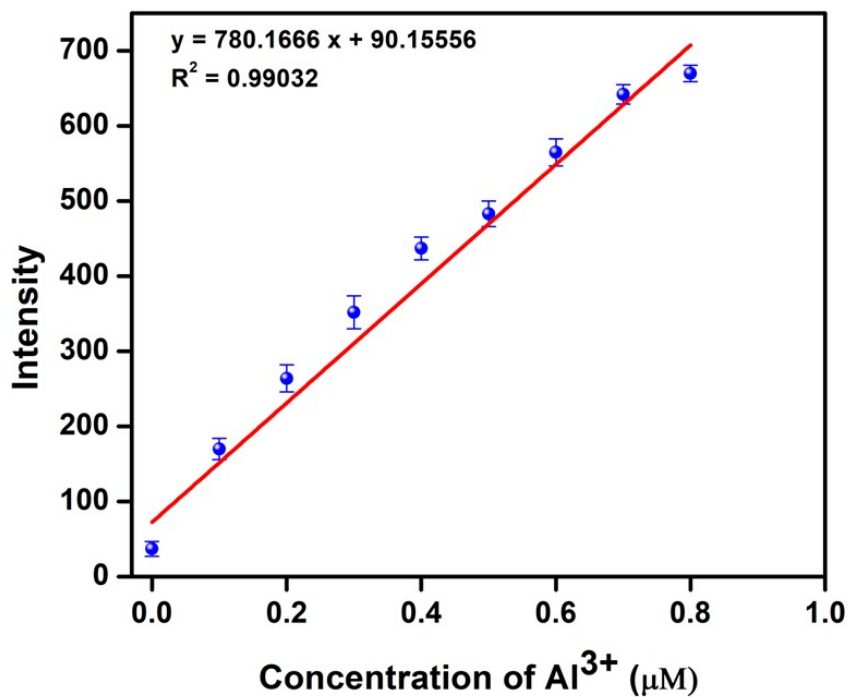

**Fig. S8.** Linear curves of the emission intensity of **NpSb** with  $\text{Al}^{3+}$  for the determination of LoD in  $\text{CH}_3\text{CN-H}_2\text{O}$  (4:1, v/v).

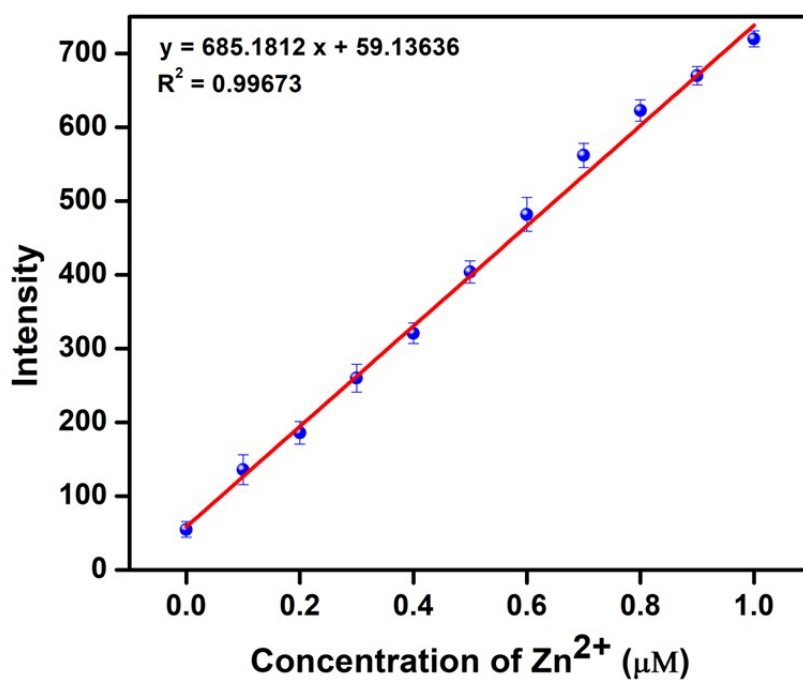

**Fig. S9.** Linear curves of the emission intensity of **NpSb** with  $\text{Zn}^{2+}$  for the determination of LoD in  $\text{CH}_3\text{CN-H}_2\text{O}$  (4:1, v/v).

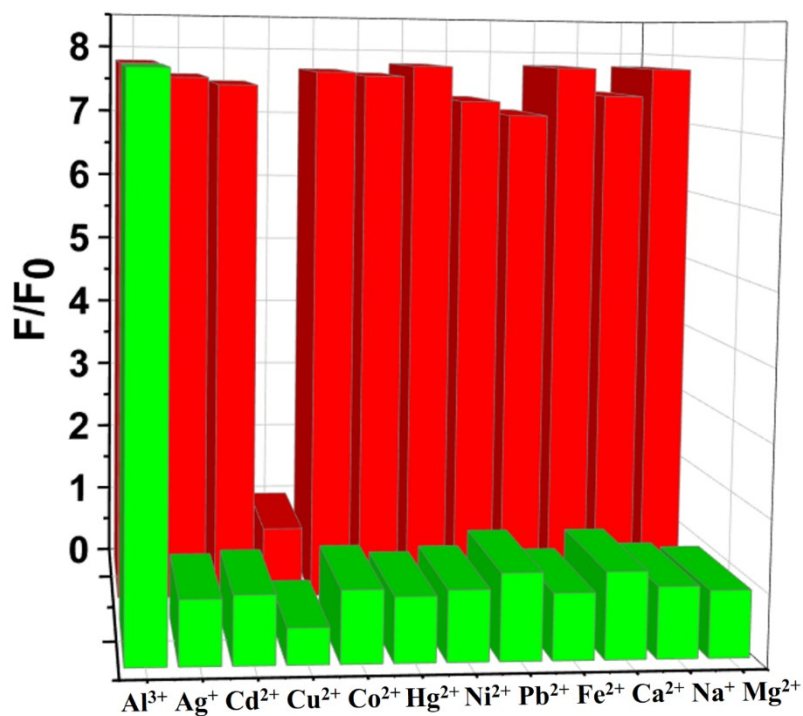

**Fig. S10.** Relative fluorescence Intensity of **NpSb** with  $\text{Al}^{3+}$  in the presence of 10 equiv of other cations in  $\text{CH}_3\text{CN-H}_2\text{O}$  (4:1, v/v).

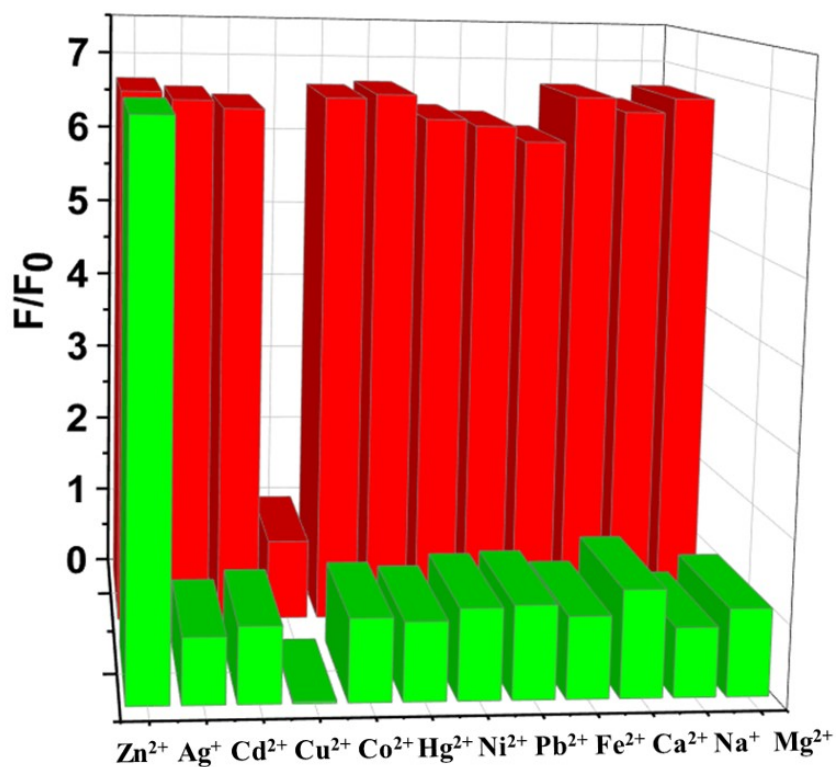

**Fig. S11.** Relative fluorescence intensity of **NpSb** with  $\text{Zn}^{2+}$  in the presence of 10 equiv of other cations in  $\text{CH}_3\text{CN-H}_2\text{O}$  (4:1, v/v) solution.

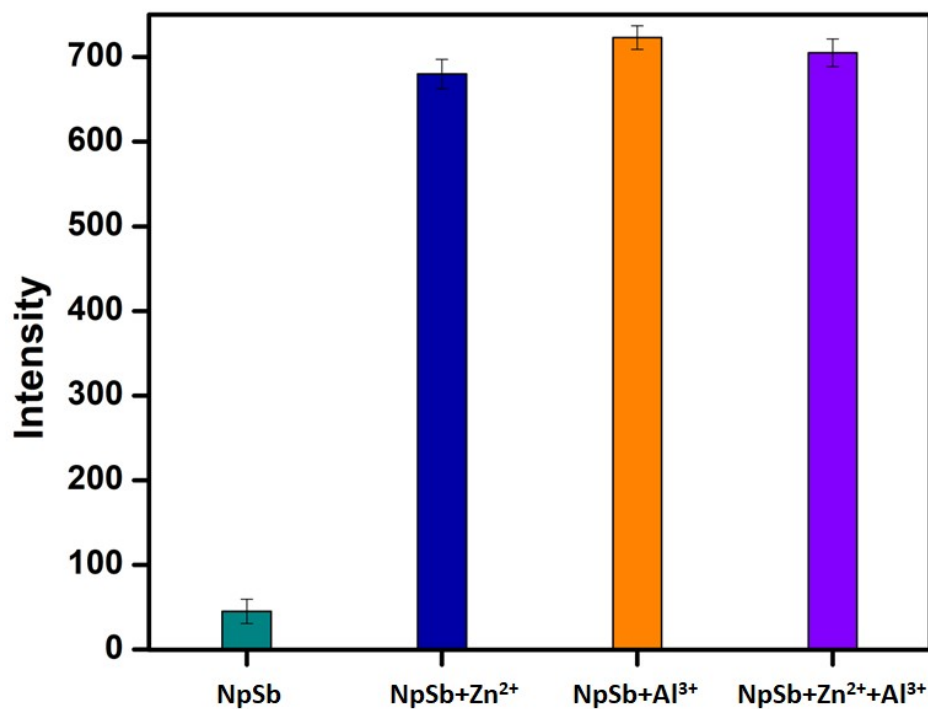

**Fig. S12.** Fluorescence Intensity of **NpSb** with  $\text{Al}^{3+}$  and  $\text{Zn}^{2+}$  in  $\text{CH}_3\text{CN-H}_2\text{O}$  (4:1, v/v) solution.

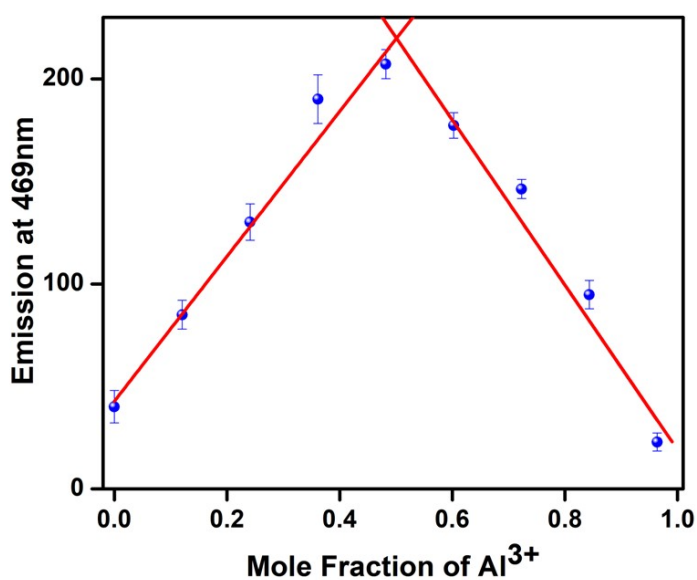

**Fig. S13.** Job's Plot analyses for **NpSb** vs.  $\text{Al}^{3+}$



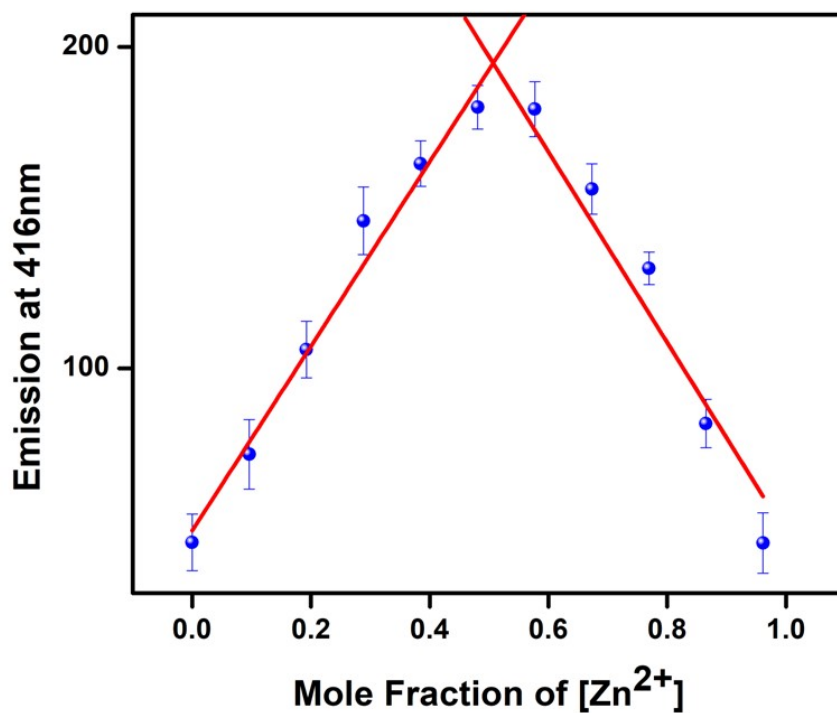

Fig. S14. Job's Plot analyses for  $NpSb$  vs.  $Zn^{2+}$

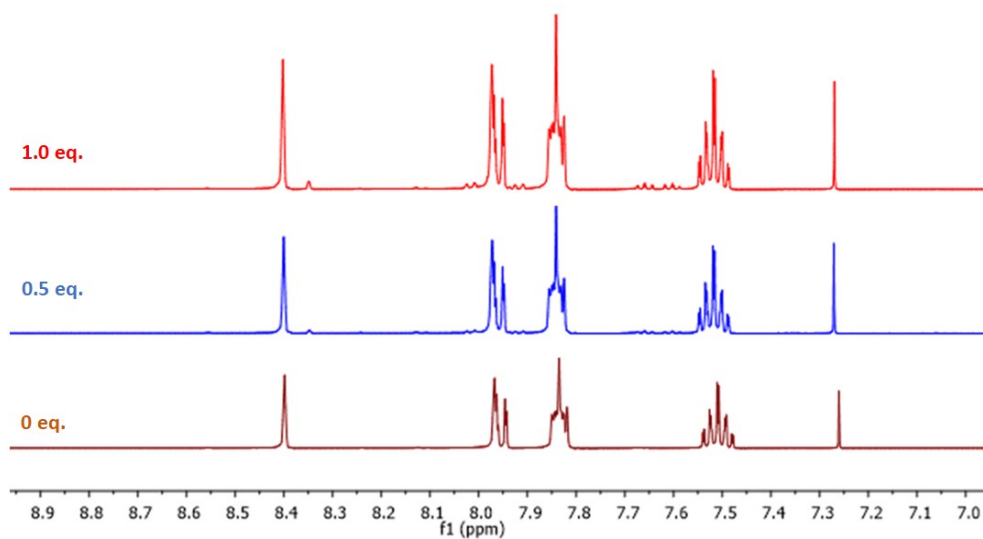

Fig. S15.  $^1H$  NMR spectra of  $NpSb$  when treated with  $Zn^{2+}$  ions.

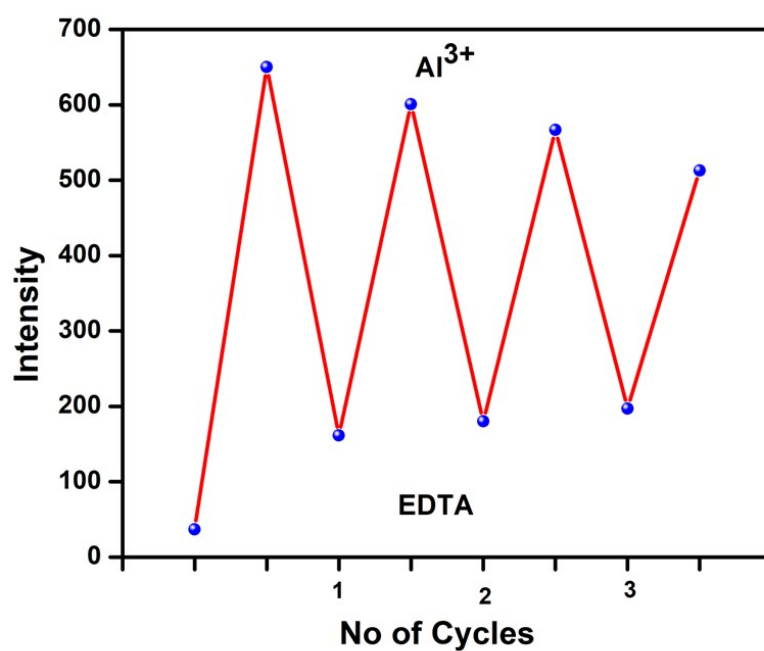

Fig. S16. Emission intensity of **NpSb** after the alternate addition of  $\text{Al}^{3+}$  and EDTA.

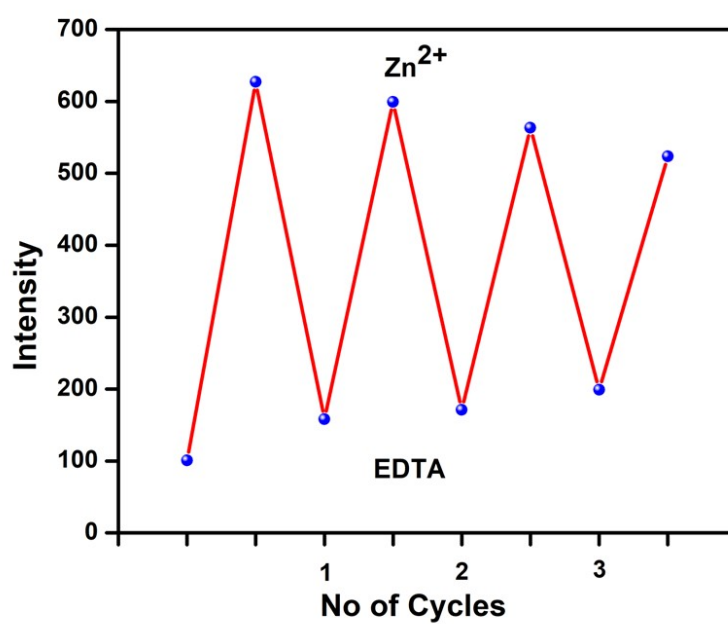

Fig. S17. Emission intensity of **NpSb** after the alternate addition of  $\text{Zn}^{2+}$  and EDTA.

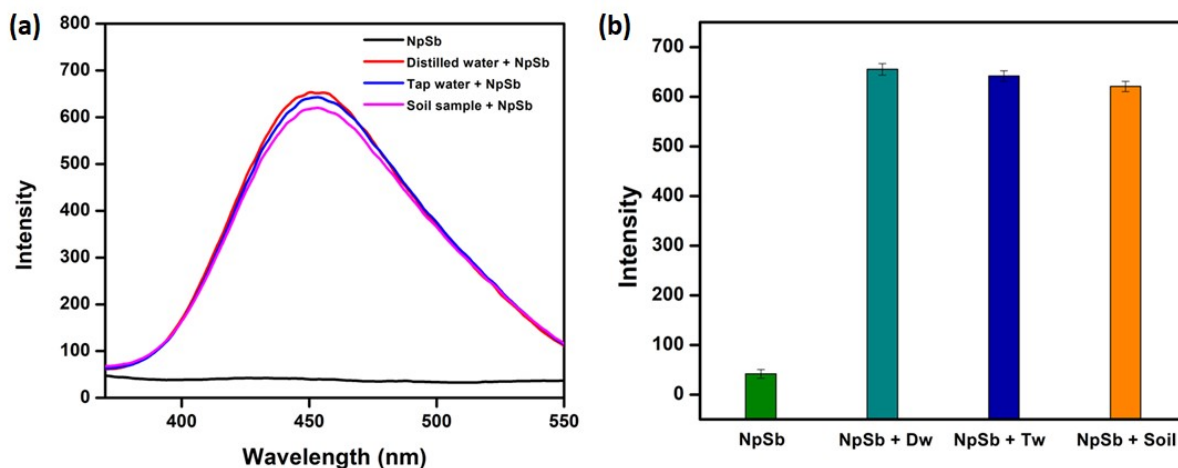

**Fig. S18.** Interaction of probe **NpSb** with real samples (distilled water, tap water and soil sample) spiked with 2.0 equiv of  $\text{Al}^{3+}$  ions. (Dw = distilled water; Tw = tap water).

### Calculation of Quantum Yield.

The fluorescence quantum yield ( $\Phi$ ) was calculated via integration of the area under fluorescence curve using equation.

$$\Phi_{\text{sample}} = \Phi_{\text{ref}} \times \frac{\text{OD}_{\text{ref}} \times A_{\text{sample}} \times \zeta_{\text{sample}}}{\text{OD}_{\text{sample}} \times A_{\text{ref}} \times \zeta_{\text{ref}}}$$

Where, OD = Optical density,

$\zeta$  = Refractive indices of solvent

A= Area under the curve

The standard use for the calculation was anthracene (0.27 in ethanol) with excitation at 340nm.

**Table S1.** Crystallographic data for **NpSb**.

|                                                                |                                                               |
|----------------------------------------------------------------|---------------------------------------------------------------|
| Formula                                                        | C <sub>26</sub> H <sub>24</sub> N <sub>2</sub> S              |
| Formula weight (gmol <sup>-1</sup> )                           | 396.53                                                        |
| Space group (hall)                                             | -P 2yn                                                        |
| Temperature/K                                                  | 150(2)                                                        |
| $\lambda$ (Å) (Cu-K $\alpha$ )                                 | 1.54184                                                       |
| Crystal system                                                 | monoclinic                                                    |
| <i>a</i> (Å)                                                   | 5.7751(6)                                                     |
| <i>b</i> (Å)                                                   | 46.275(3)                                                     |
| <i>c</i> (Å)                                                   | 7.7780(8)                                                     |
| $\alpha$ (°)                                                   | 90                                                            |
| $\beta$ (°)                                                    | 90.655(10)                                                    |
| $\gamma$ (°)                                                   | 90                                                            |
| <i>V</i> (Å <sup>3</sup> )                                     | 2078.5(3)                                                     |
| <i>Z</i>                                                       | 4                                                             |
| $\rho_{\text{calc}}$ (gcm <sup>-3</sup> )                      | 1.267                                                         |
| Crystal size (mm)                                              | 0.18 × 0.15 × 0.10                                            |
| <i>F</i> (000)                                                 | 840                                                           |
| Index ranges                                                   | -7 < <i>h</i> < 7<br>-56 < <i>k</i> < 56<br>-9 < <i>l</i> < 9 |
| Reflns/ para/ restraints.                                      | 3889/263/407                                                  |
| <i>GOF</i> on <i>F</i> <sup>2</sup>                            | 1.119                                                         |
| <i>R</i> 1 <sup>a</sup> [ <i>I</i> > 2 $\sigma$ ( <i>I</i> )]  | 0.1178                                                        |
| <i>R</i> 1[all data]                                           | 0.1694                                                        |
| <i>wR</i> 2 <sup>b</sup> [ <i>I</i> > 2 $\sigma$ ( <i>I</i> )] | 0.3025                                                        |
| <i>wR</i> 2 [all data]                                         | 0.3474                                                        |

$$^a R1 = \frac{\sum ||F_o| - |F_c||}{\sum |F_o|}; \quad ^b wR2 = \frac{\sum w(|F_o|^2 - |F_c|^2)}{\sum w(F_o)^2}^{1/2}$$

**Table S2.** Selected bond lengths [Å] and angles [°] in the single crystals of **NpSb**.

| Bond Length (Å) |           | Bond Angle (°)   |           |
|-----------------|-----------|------------------|-----------|
| S(1)–C(13)      | 1.784(10) | C(13)–S(1)–C(14) | 101.7(5)  |
| S(1)–C(14)      | 1.803(9)  | C(12)–C(13)–S(1) | 112.6(7)  |
| C(13)–C(12)     | 1.510(13) | C(15)–C(14)–S(1) | 112.6(6)  |
| C(14)–C(15)     | 1.510(13) | C(15)–N(2)–C(16) | 116.1(8)  |
| C(12)–N(1)      | 1.477(12) | C(11)–N(1)–C(12) | 116.0(10) |
| C(15)–N(2)      | 1.478(11) |                  |           |
| C(11)–N(1)      | 1.263(12) |                  |           |
| C(16)–N(2)      | 1.257(11) |                  |           |

**Table S3.** Detection of Al<sup>3+</sup> in real samples.

| <b>Tap water</b>       | <b>Al<sup>3+</sup> added (μM)</b> | <b>Al<sup>3+</sup> calculated (μM)</b> | <b>% Recovery</b> |
|------------------------|-----------------------------------|----------------------------------------|-------------------|
|                        | 0.3                               | 0.28                                   | 93.3              |
|                        | 0.8                               | 0.77                                   | 96.2              |
| <b>Distilled water</b> |                                   |                                        |                   |
|                        | 0.3                               | 0.29                                   | 96.6              |
|                        | 0.8                               | 0.83                                   | 103.7             |
| <b>Soil sample</b>     |                                   |                                        |                   |
|                        | 0.3                               | 0.31                                   | 103.3             |
|                        | 0.8                               | 0.81                                   | 98.7              |
